# Supplementary material for: Investigation of Novel Small Molecular TRPM4 Inhibitors in Colorectal Cancer Cells
Source: MDPI journal article supplement (doi:10.3390/cancers13215400), 2021-10-28
Supplement: s1 [file s1]

# Supplementary Materials: Investigation of Novel Small Molecular TRPM4 Inhibitors in Colorectal Cancer Cells

Paulina Stokłosa, Anna Borgström, Barbara Hauert, Roland Baur and Christine Peinelt

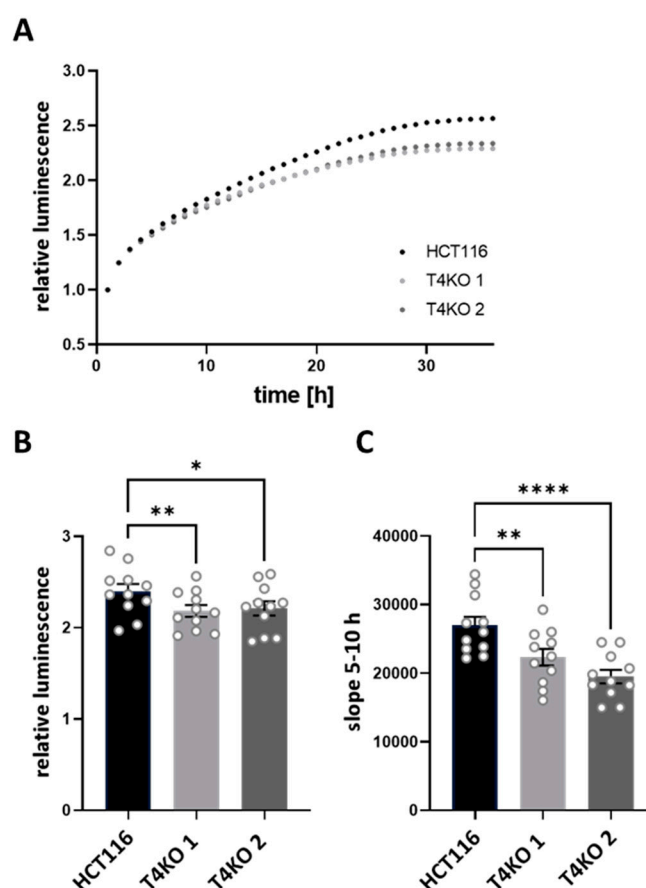

**Figure S1.** Viability of T4KO cell lines is decreased in comparison to the parental cell line, HCT116. Analysis of cell viability in HCT116, T4KO 1 and T4KO 2 cells. Data were pooled from viability experiments (non- treat. control) in Figure 1 A–C ( $n = 4$ ), Figure S2 A–C ( $n = 4$ ) and Figure S3 A–C ( $n = 3$ ) for HCT116, T4KO 1 and T4KO 2. The overall sample size is 11. Cell viability was evaluated using RealTime Glo MT assay. **(A)** Mean of relative luminescence was plotted versus time for HCT116, T4KO 1 and T4KO 2 cells. **(B)** Scatter plot and bar diagram of data (mean + SD) at 24 h **(C)** Scatter plot and bar diagram of slope steepness between 5–10 h (mean + SD) from data in **(A)**, **(B)**, **(C)**. One-way ANOVA was used to determine statistical significance in (\* $p < 0.05$ , \*\* $p < 0.005$ , \*\*\* $p < 0.0005$ , \*\*\*\* $p < 0.0001$ ) in B and C.

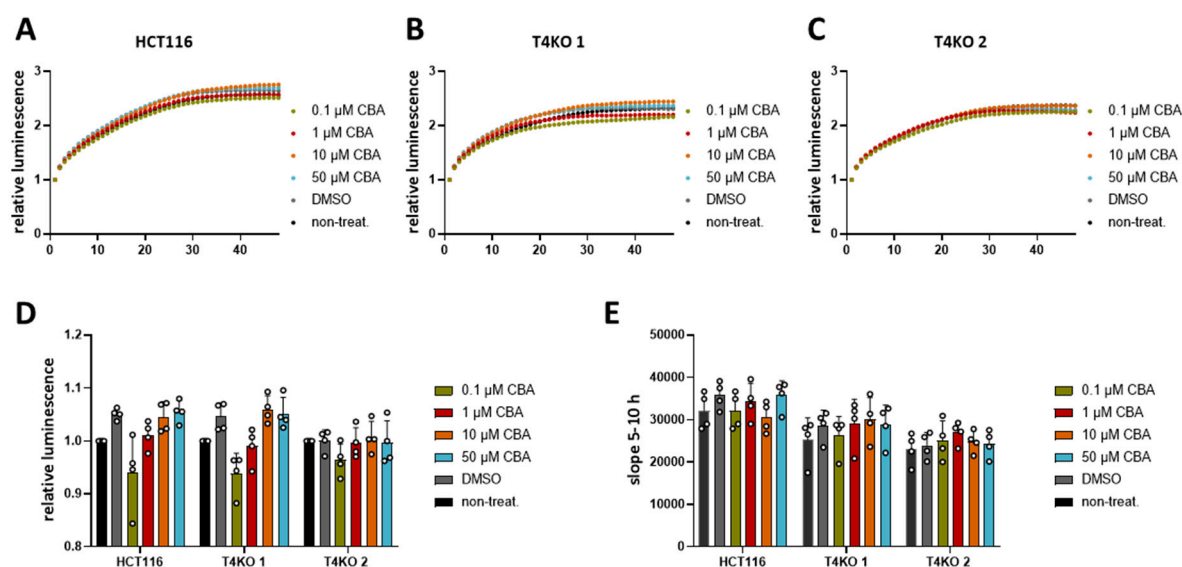

**Figure S2.** Viability of HCT116 and T4KO cell lines after treatment with CBA. (A) Mean of relative luminescence was plotted versus time for HCT116 cells. (B) Same for T4KO 1 cells. (C) Same for T4KO 2 cells. (D) Scatter plot and bar diagram of data (mean + SD) at 24 h from four independent experiments in (A), (B), (C). (E) Scatter plot and bar diagram of slope steepness between 5–10 h (mean + SD) from data in (A), (B), (C).

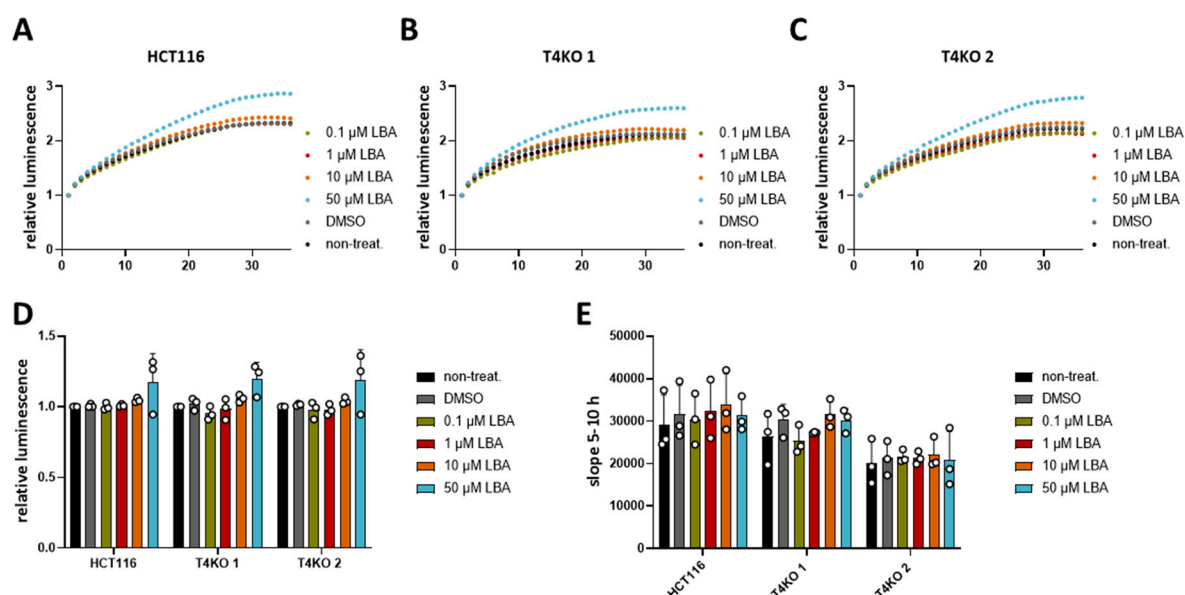

**Figure S3.** Viability of HCT116 and T4KO cell lines after treatment with LBA. Cell viability in HCT116, T4KO 1 and T4KO 2 was evaluated using a RealTime-Glo MT assay. Cells were treated with 0.1  $\mu$ M, 1  $\mu$ M, 10  $\mu$ M, 50  $\mu$ M LBA or DMSO control. Three independent experiments were performed. (A) Mean of relative luminescence was plotted versus time for HCT116 cells. (B) Same for T4KO 1 cells. (C) Same for T4KO 2 cells. (D) Scatter plot and bar diagram of data (mean + SD) at 24 h from three independent experiments in (A), (B), (C). (E) Scatter plot and bar diagram of slope steepness between 5–10 h (mean + SD) from data in (A), (B), (C).

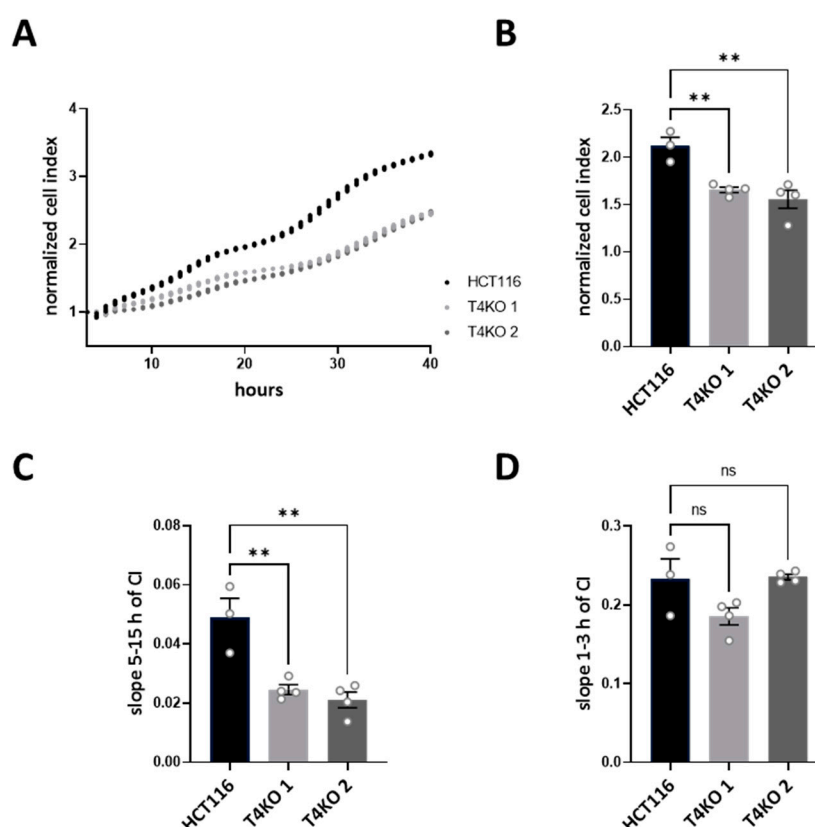

**Figure S4.** Proliferation of HCT116 and T4KO cell lines. Cell proliferation was determined with an xCELLigence® system. Three to four independent experiments were performed. (A) Mean of normalized cell index was plotted versus time for HCT116, T4KO 1 and T4KO 2. (B) Scatter plot and bar diagram of data (mean + SD) at 24 h from the experiment in (A). (C) Scatter plot and bar diagram of slope steepness (mean + SD) between 5–15 h from data in (A). (D) Scatter plot and bar diagram of slope steepness (mean + SD) 1–3 h from data in (A). One-way ANOVA was used to determine statistical significance (\* $p < 0.05$ , \*\* $p < 0.005$ ) in D and E.

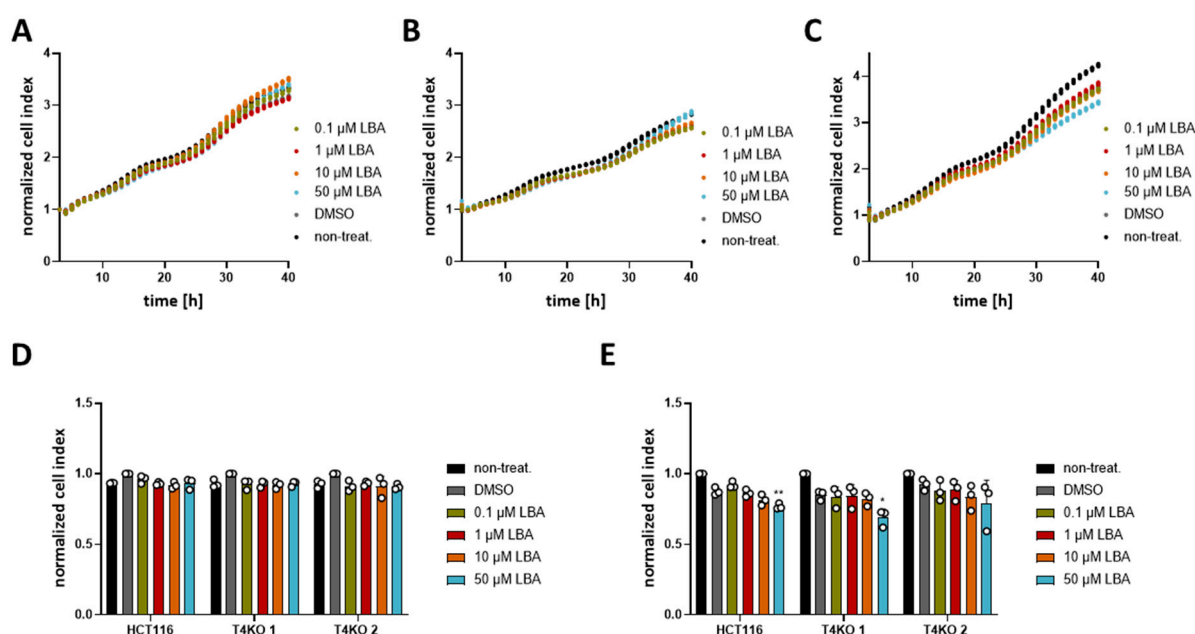

**Figure S5.** Effect of LBA on HCT116 cells' proliferation. Cell proliferation was determined with an xCELLigence® system. Cells were treated with 0.1  $\mu$ M, 1  $\mu$ M, 10  $\mu$ M, 50  $\mu$ M LBA or DMSO control. Three independent experiments were performed. (A) Mean of cell index was plotted versus time for HCT116 cells. (B) Same as (A) for T4KO 1 cells. (C) Same as

(A) for T4KO 2 cells. (D) Scatter plot and bar diagram of data (mean + SD) at 24 h from the experiment in (A), (B), (C). (E) Scatter plot and bar diagram of slope steepness between 5–15 h (mean + SD) from data in (A), (B), (C).

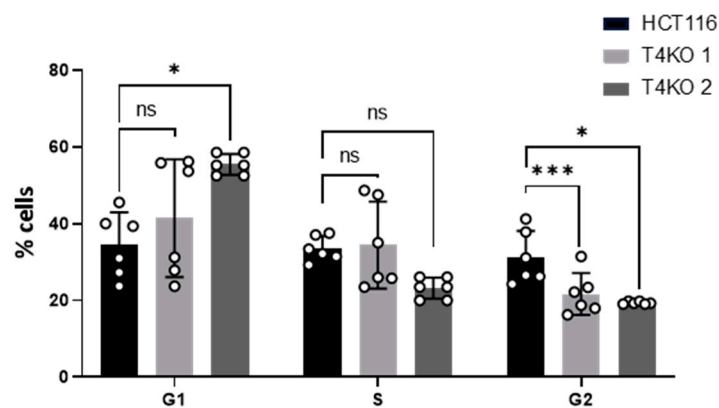

**Figure S6.** Cell cycle distribution in HCT116 and T4KO cell lines. FACS-based cell cycle analysis. Experiment was repeated three times with two replicates in each experiment. Scatter plot and bar diagram (mean + SD) for cell cycle distribution of HCT116, T4KO 1 and T4KO 2 cells (\*  $p < 0.05$ , \*\*\*  $p < 0.0005$ , ns—non significant).
